# Supplementary material for: Sex specificity of pancreatic cancer cachexia phenotypes, mechanisms, and treatment in mice and humans: role of Activin
Source: PubMed Central journal article supplement — J Cachexia Sarcopenia Muscle. 2022 May 5;13(4):2146–61. doi: 10.1002/jcsm.12998 (PMC9397557; doi:10.1002/jcsm.12998), 2022-05-05

# Supplemental data file 1: RNAseq results

Zhong X, Narasimhan A, Silverman LM, Young AR, Shahda S, Liu S,  
Wan J, Liu Y, Koniaris LG, Zimmers TA

**Sex specificity of pancreatic cancer cachexia phenotypes,  
mechanisms, and treatment in mice and humans – role of Activin**

**JCSM 2022**

# Motivation

- Detect differential genes between conditions

|               |                         |    |                         |
|---------------|-------------------------|----|-------------------------|
| Comparison 1  | KPC_Vehicle_Male_Late   | vs | Control_Male_Late       |
| Comparison 2  | KPC_Vehicle_Female_Late | vs | Control_Female_Late     |
| Comparison 3  | KPC_Male_Early          | vs | Control_Male_Early      |
| Comparison 4  | KPC_Female_Early        | vs | Control_Female_Early    |
| Comparison 5  | KPC_sACTR_Male_Late     | vs | KPC_Vehicle_Male_Late   |
| Comparison 6  | KPC_sACTR_Female_Late   | vs | KPC_Vehicle_Female_Late |
| Comparison 7  | KPC_sACTR_Male_Late     | vs | Control_Male_Late       |
| Comparison 8  | KPC_sACTR_Female_Late   | vs | Control_Female_Late     |
| Comparison 9  | KPC_Vehicle_Male_Late   | vs | KPC_Vehicle_Female_Late |
| Comparison 10 | KPC_Male_Early          | vs | KPC_Female_Early        |
| Comparison 11 | KPC_sACTR_Male_Late     | vs | KPC_sACTR_Female_Late   |
| Comparison 12 | Control_Male_Late       | vs | Control_Female_Late     |
| Comparison 13 | Control_Male_Early      | vs | Control_Female_Early    |

# DE analysis

|               | Human                                            | FDR/P value cut off | log2FC   | # of up genes | # of down genes |
|---------------|--------------------------------------------------|---------------------|----------|---------------|-----------------|
| Comparison 1  | KPC_Vehicle_Male_Late vs Control_Male_Late       | FDR < 0.05          | >log2(2) | 416           | 499             |
| Comparison 2  | KPC_Vehicle_Female_Late vs Control_Female_Late   | FDR < 0.05          | >log2(2) | 486           | 614             |
| Comparison 3  | KPC_Male_Early vs Control_Male_Early             | FDR < 0.05          | >log2(2) | 6             | 60              |
| Comparison 4  | KPC_Female_Early vs Control_Female_Early         | FDR < 0.05          | >log2(2) | 11            | 2               |
| Comparison 5  | KPC_sACTR_Male_Late vs KPC_Vehicle_Male_Late     | FDR < 0.05          | >log2(2) | 49            | 67              |
| Comparison 6  | KPC_sACTR_Female_Late vs KPC_Vehicle_Female_Late | FDR < 0.05          | >log2(2) | 1             | 1               |
| Comparison 7  | KPC_sACTR_Male_Late vs Control_Male_Late         | FDR < 0.05          | >log2(2) | 257           | 322             |
| Comparison 8  | KPC_sACTR_Female_Late vs Control_Female_Late     | FDR < 0.05          | >log2(2) | 333           | 356             |
| Comparison 9  | KPC_Vehicle_Male_Late vs KPC_Vehicle_Female_Late | FDR < 0.05          | >log2(2) | 11            | 10              |
| Comparison 10 | KPC_Male_Early vs KPC_Female_Early               | FDR < 0.05          | >log2(2) | 94            | 40              |
| Comparison 11 | KPC_sACTR_Male_Late vs KPC_sACTR_Female_Late     | FDR < 0.05          | >log2(2) | 29            | 11              |
| Comparison 12 | Control_Male_Late vs Control_Female_Late         | FDR < 0.05          | >log2(2) | 87            | 76              |
| Comparison 13 | Control_Male_Early vs Control_Female_Early       | FDR < 0.05          | >log2(2) | 53            | 28              |

# Volcano plot – comparison 1 and 2

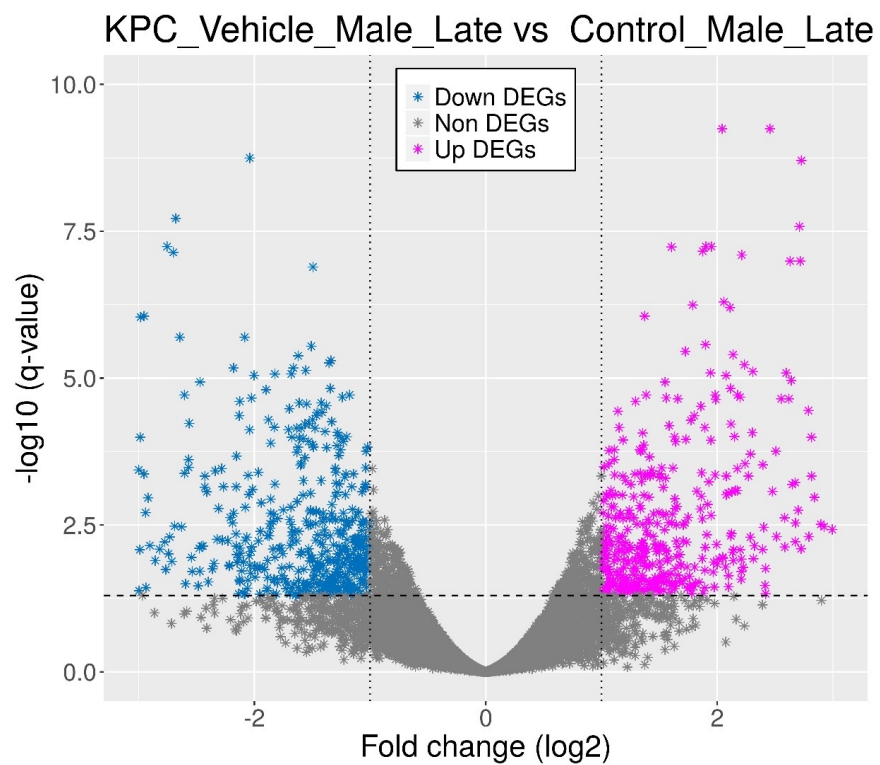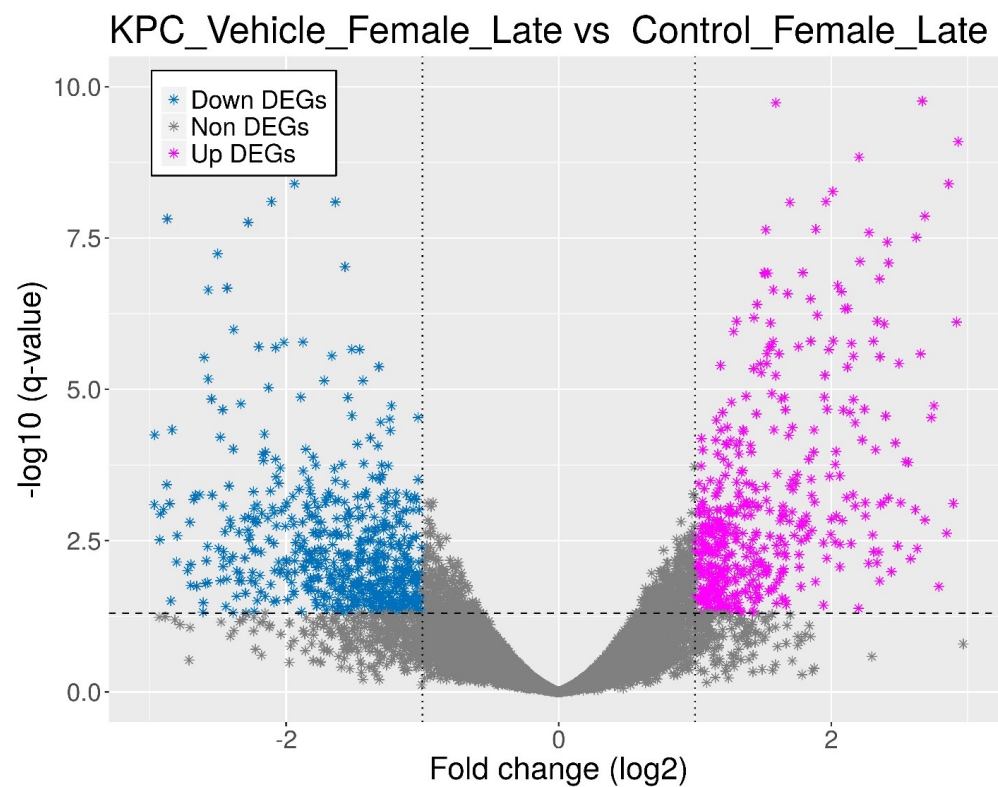

# Volcano plot – comparison 3 and 4

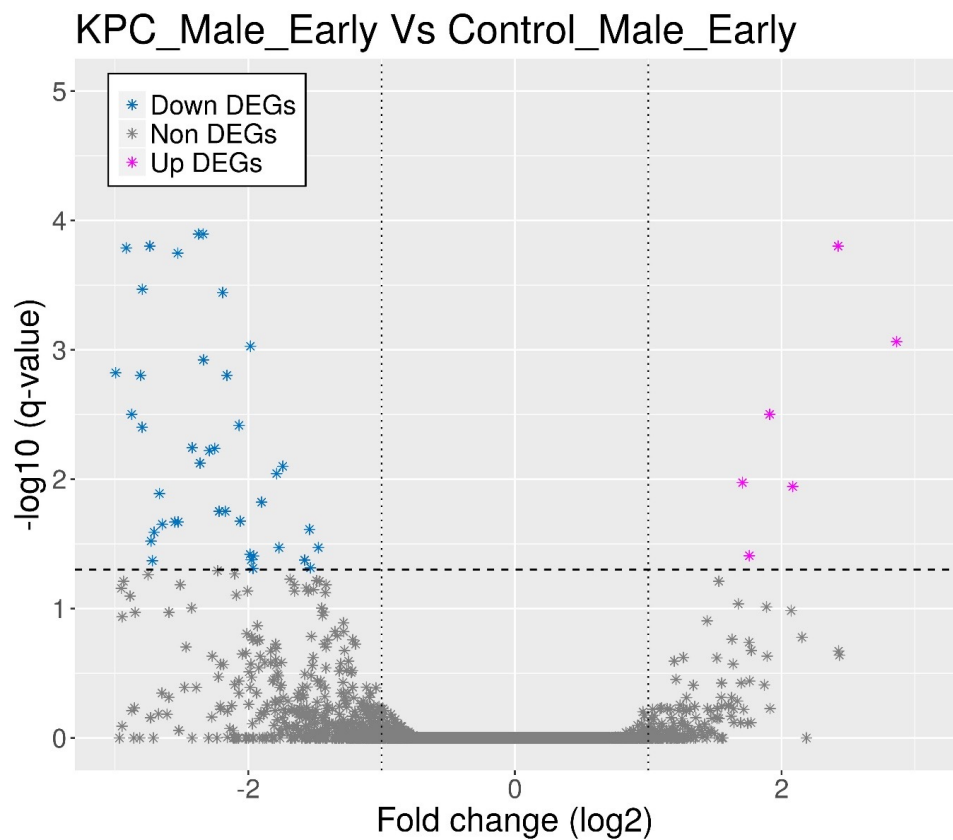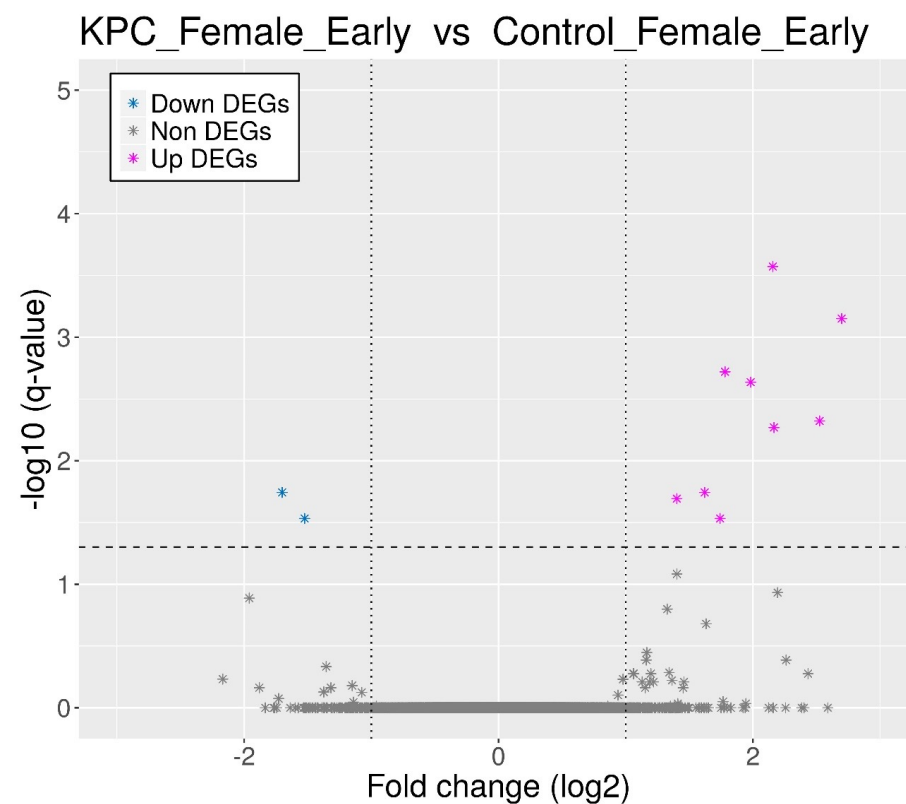

# Volcano plot – comparison 5 and 6

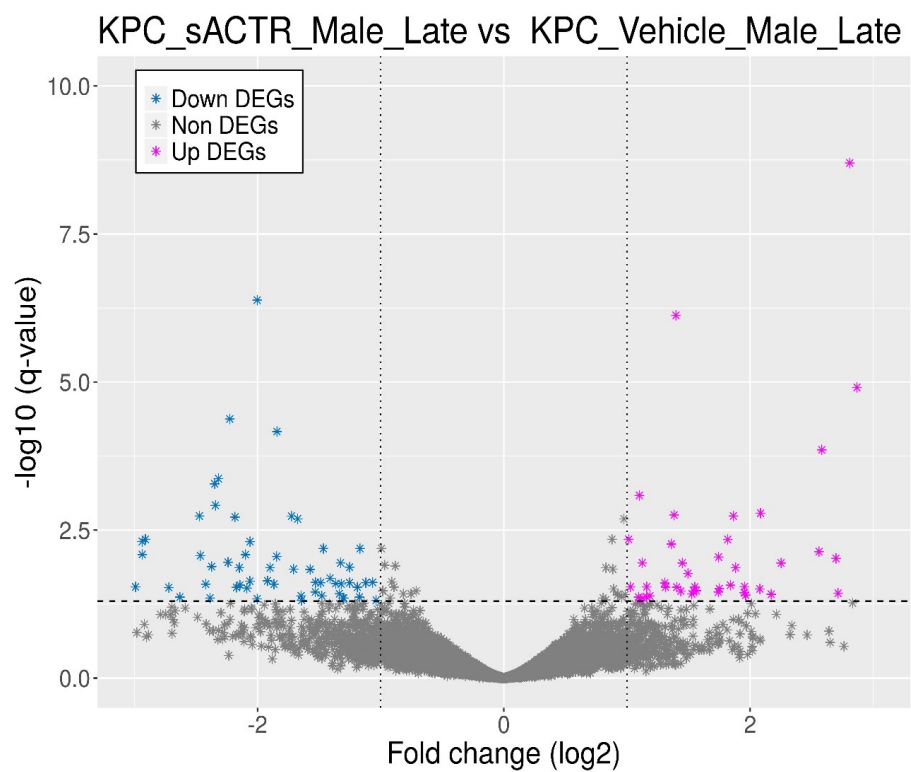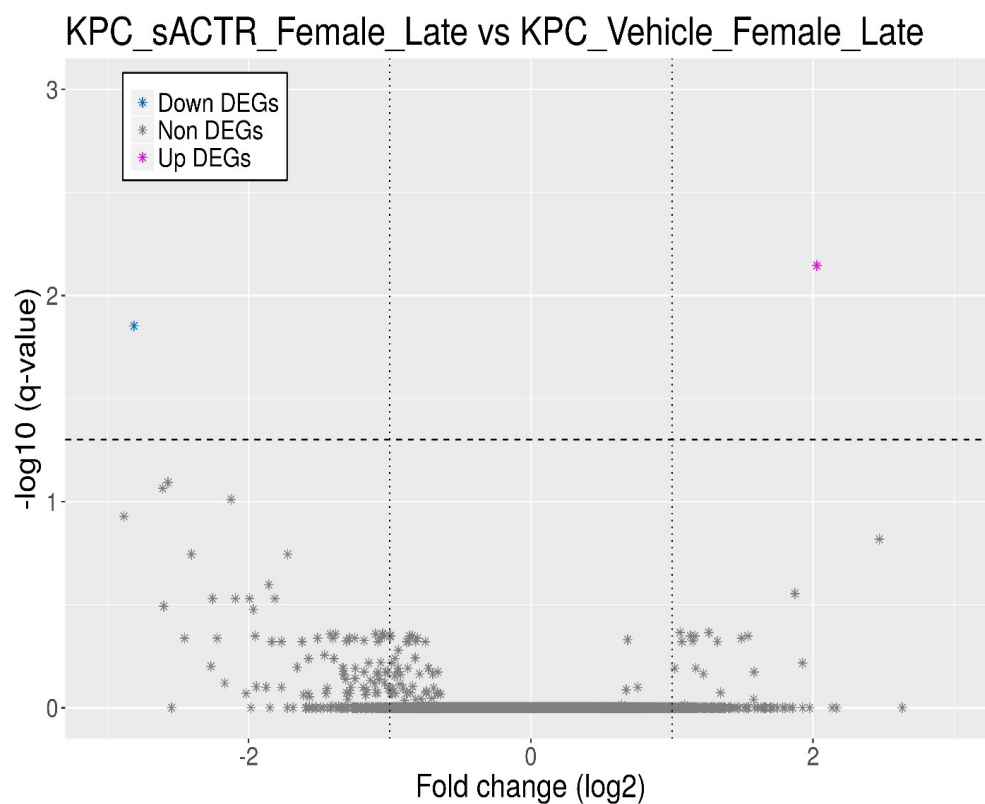

# Volcano plot – comparison 7 and 8

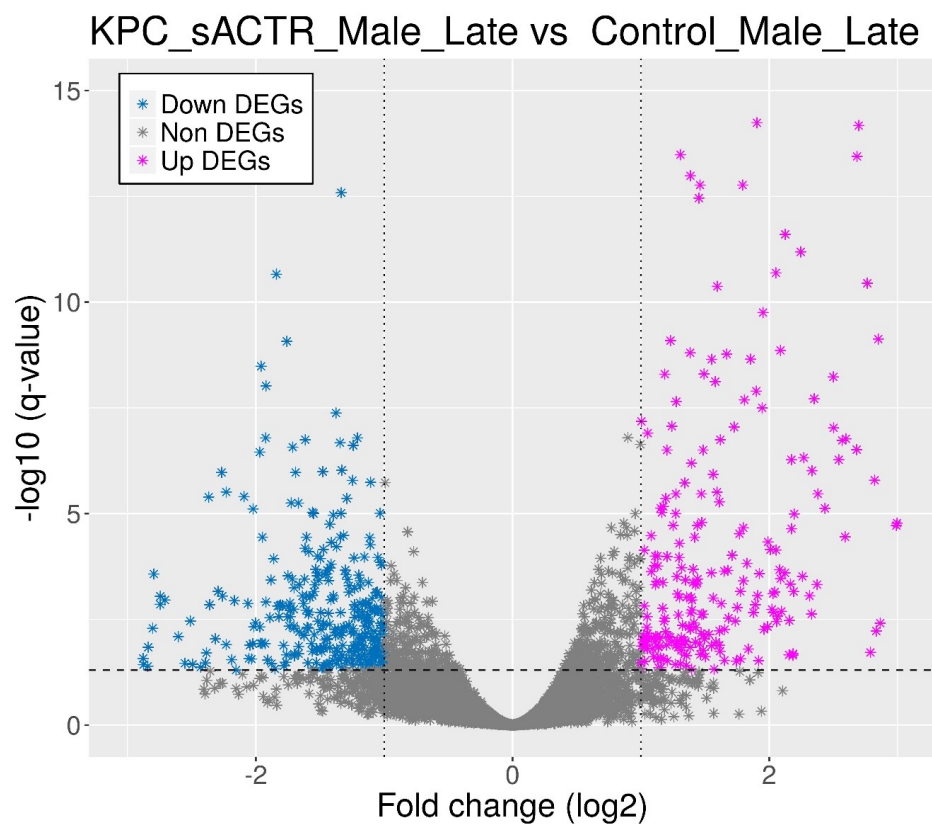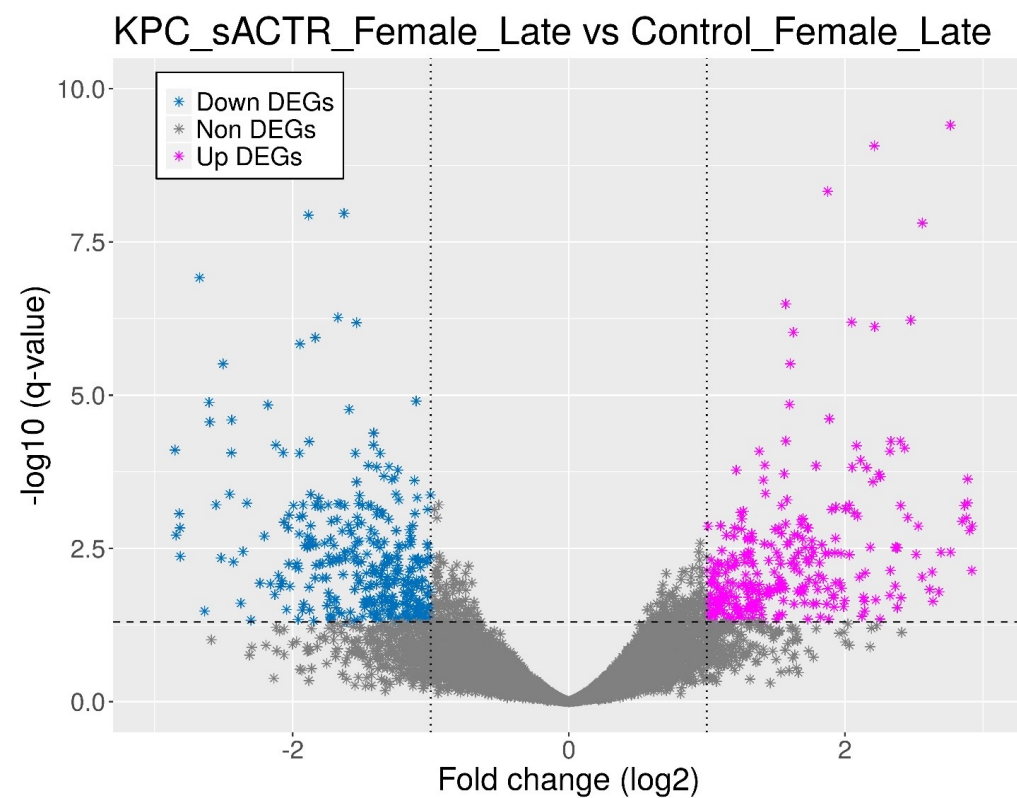

# Volcano plot – comparison 9 and 10

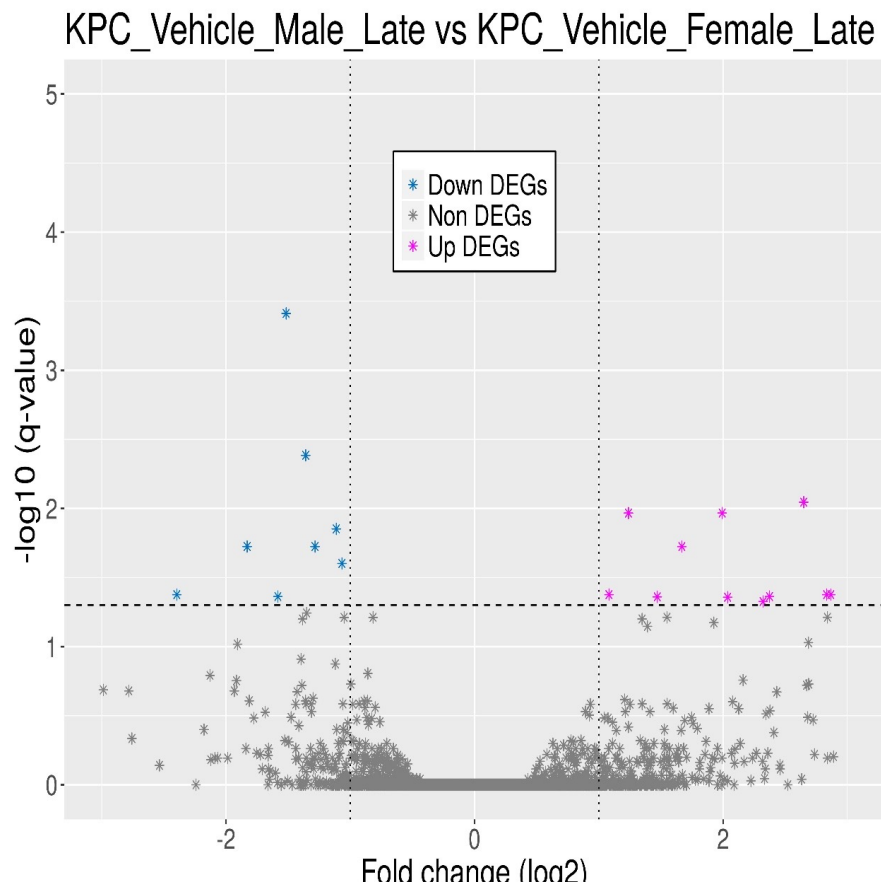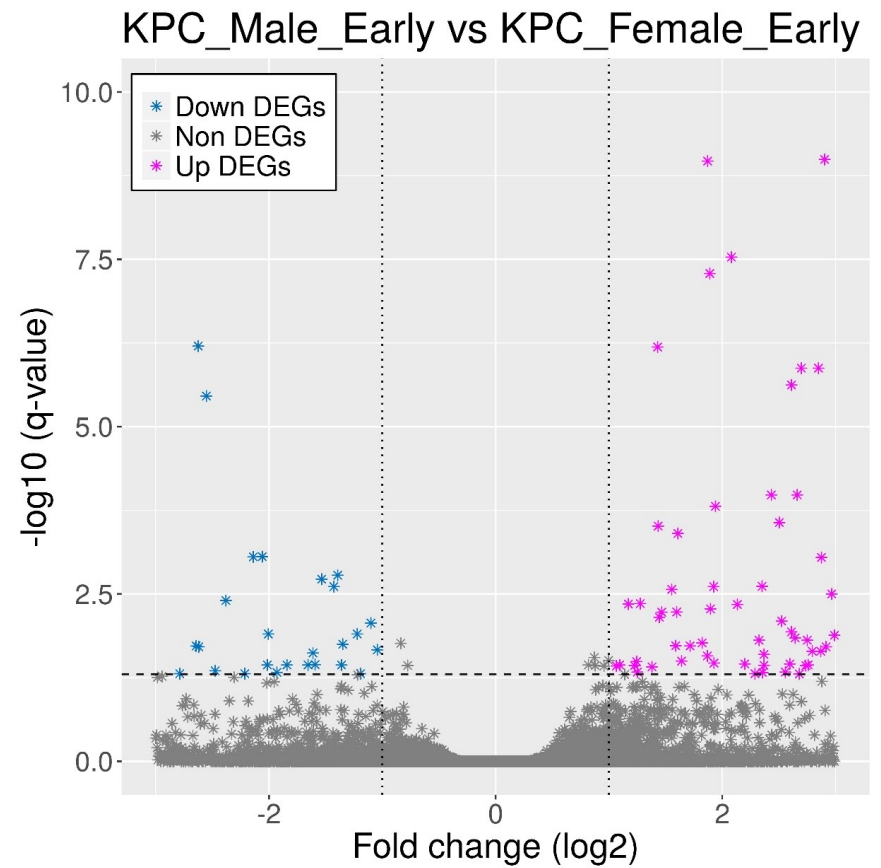



# Volcano plot – comparison 11, 12, and 13

KPC\_sACTR\_Male\_Late vs KPC\_sACTR\_Female\_Late

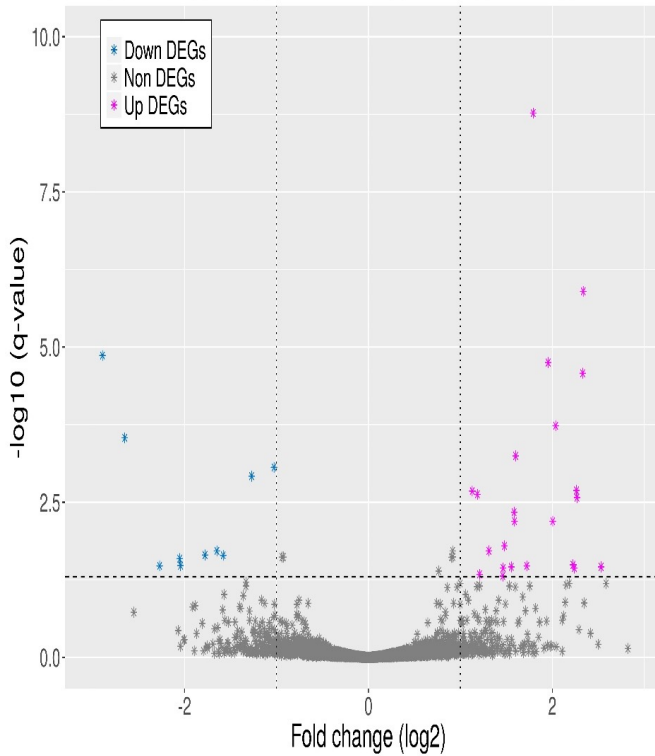

Control\_Male\_Late vs Control\_Female\_Late

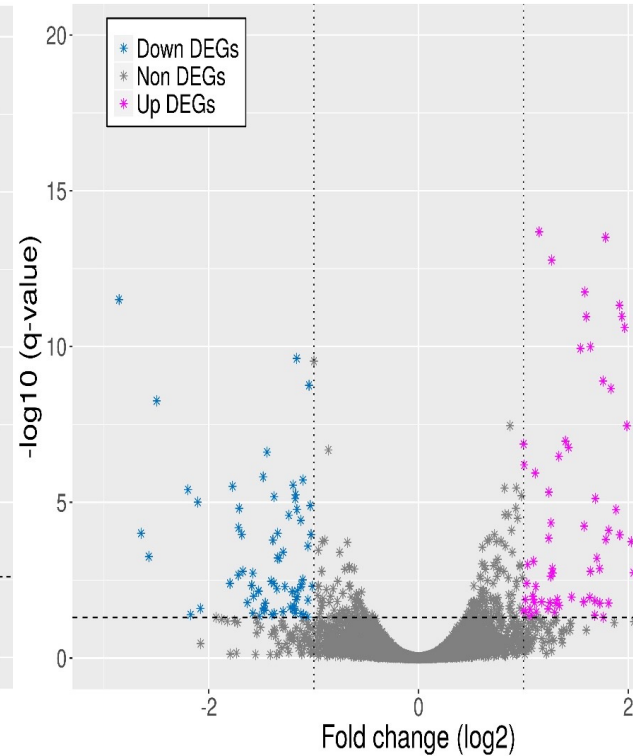

Control\_Male\_Early vs Control\_Female\_Early

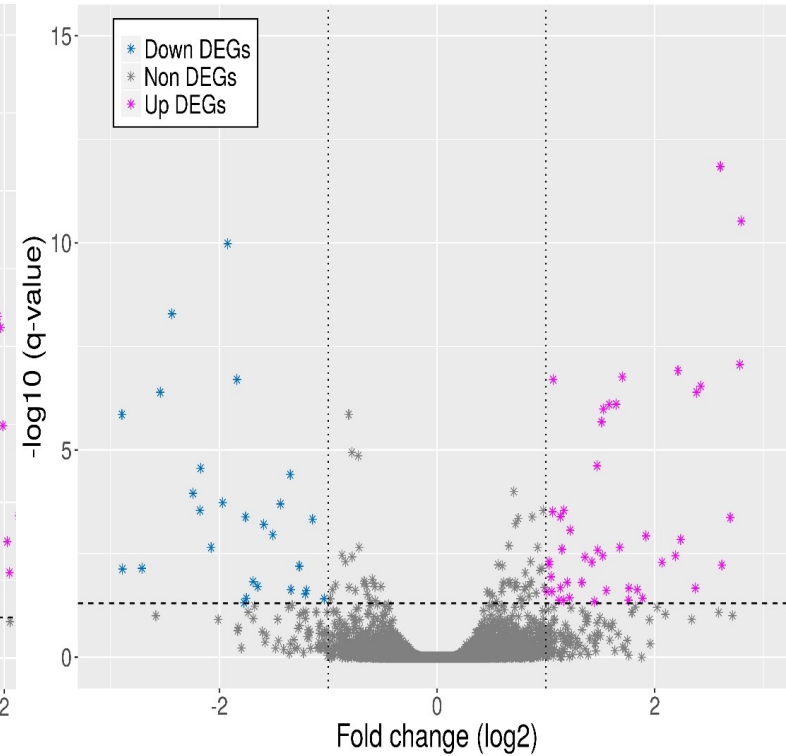

Supplement: JCSM-13-2146-s002.pdf [file JCSM-13-2146-s002.pdf]
